# Supplementary material for: Puerto Rican Students Rising in STEM: Findings from a Multicampus Collaborative CURE Program to Promote Student Success
Source: Atypon-hosted journal article supplement (doi:10.1187/cbe.23-05-0083), 2023-11-02
Supplement: combinedsupmats.pdf [file combinedsupmats.pdf]

# **Supplemental Material**

*CBE—Life Sciences Education*

Alvarez-Berrios and Haynes

**Sense of Belonging Items – modified by Dr. Haynes from the AACU TIDES Project  
(Winter & Haynes, 2019)**

Winter, K., & Haynes, G. (2019). Measurement and Assessment. In *Culturally Responsive Strategies for Reforming STEM Higher Education: Turning the TIDES on Inequity* (Vol. 1, Issue 1, pp. 259–272). Emerald Publishing Limited. <https://doi.org/10.1080/00049535808255957>

Please indicate the extent to which you agree with each of the following statements on a scale of 0 - 10, where 0 means you do not agree at all (no agreements) and 10 means you agree completely (100% agreement)

- I have developed personal relationships with other students in STEM classes.
- I discuss events which happen outside of STEM classes with my classmates.
- I receive thoughtful and timely comments on my work from my STEM instructors.
- If I had a reason, I would feel comfortable seeking help from a STEM faculty member outside of class time (i.e., during office hours, etc.).
- I could call another student from my STEM classes if I had a question about an assignment.
- I know very few people in my STEM classes.
- I have developed personal relationships with other students in STEM classes.
- I have met with classmates outside of class to study for a STEM exam.
- I feel comfortable asking questions in STEM classes.
